# Supplementary material for: Interaction and Redox Chemistry between Iron, Dopamine, and Alpha-Synuclein C-Terminal Peptides
Source: MDPI journal article supplement (doi:10.3390/antiox12040791), 2023-03-24
Supplement: s1 [file s1]

# Supplementary materials: Interaction and Redox Chemistry Between Iron, Dopamine and Alpha-Synuclein C-Terminal Peptides

Fabio Schifano <sup>1,2</sup>, Simone Dell'Acqua <sup>1</sup>, Stefania Nicolis <sup>1</sup>, Luigi Casella <sup>1,\*</sup> and Enrico Monzani <sup>1,\*</sup>

<sup>1</sup> Department of Chemistry, University of Pavia, Via Taramelli 12, 27100 Pavia, Italy; fabio.schifano01@universitadipavia.it (F.S.); simone.dellacqua@unipv.it (S.D.); stefania.nicolis@unipv.it (S.N.); enrico.monzani@unipv.it (E.M.); luigi.casella@unipv.it (L.C.)

<sup>2</sup> IUSS University School for Advanced Studies of Pavia, Palazzo del Broletto, Piazza della Vittoria 15, 27100 Pavia, Italy

\* Correspondence: enrico.monzani@unipv.it (E.M.); luigi.casella@unipv.it (L.C.)

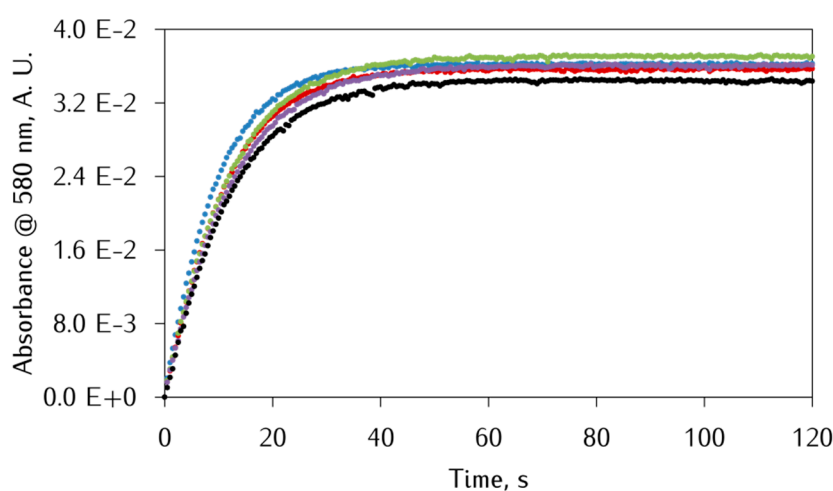

**Figure S1.** Kinetic traces of DA-Fe<sup>II</sup> (20:1) interaction as a function of Ac-αSpS119-132 concentration ( $\lambda_{\max}$  = 580 nm) in 10 mM Mops buffer pH 7.0 and 37 °C, iron(II) 10  $\mu$ M, DA 0.2 mM (blue) and increasing amount of Ac-αSpS119-132 (0.5 equiv.: red, 1 equiv.: green, 1.5 equiv.: purple, 2 equiv.: black).

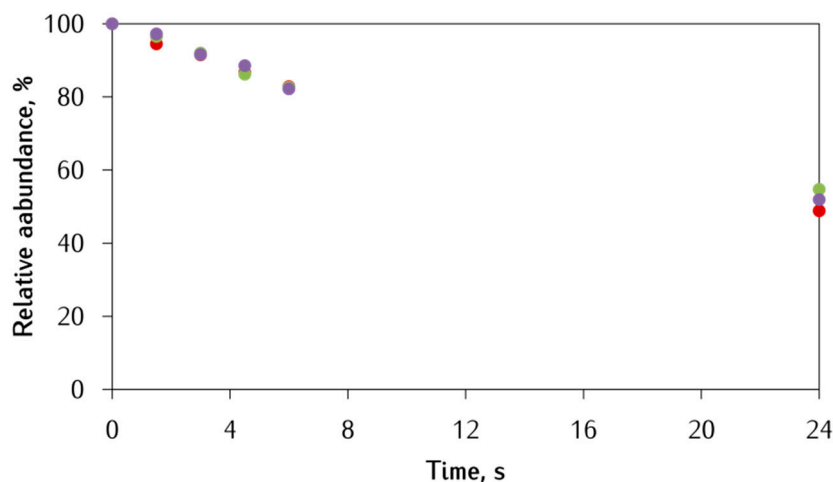

**Figure S2.** RP-HPLC kinetic traces of 200  $\mu$ M DA in Mops buffer pH 7.0 and 37 °C (blue) in presence of 10  $\mu$ M of iron(II) (red) and 2 equiv. of peptide (Ac-αS119-132: green, Ac-αSpS119-132: purple, Ac-αSpYPS119-132: cyan).

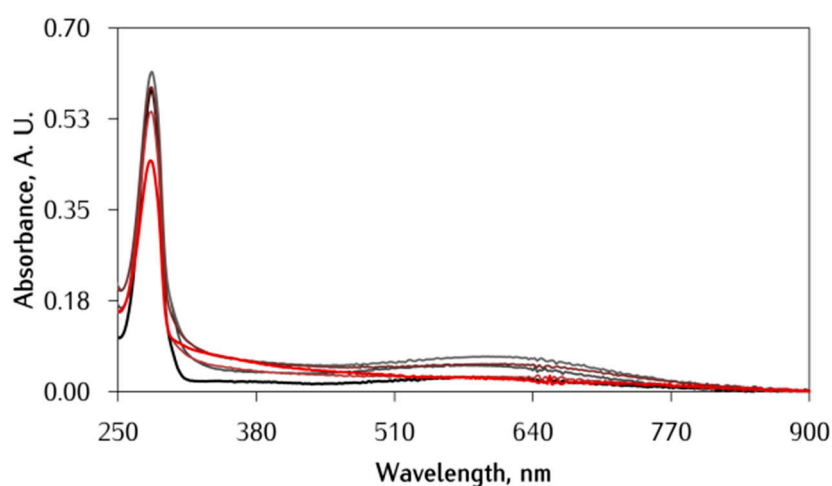

**Figure S3.** UV-Vis spectra of DA oxidation kinetics by  $\text{Fe}^{\text{III}}$ -Ac- $\alpha$ S119-132 complex (DA:Fe 20:1) in 10 mM Mops buffer pH 7.0 and SDS 20 mM, 37 °C; progression of time is rendered as color hue transition from black (0 h) towards red (24 h). Spectra were recorded at 0, 1.5, 3.0, 4.5, 6 and 24 h.

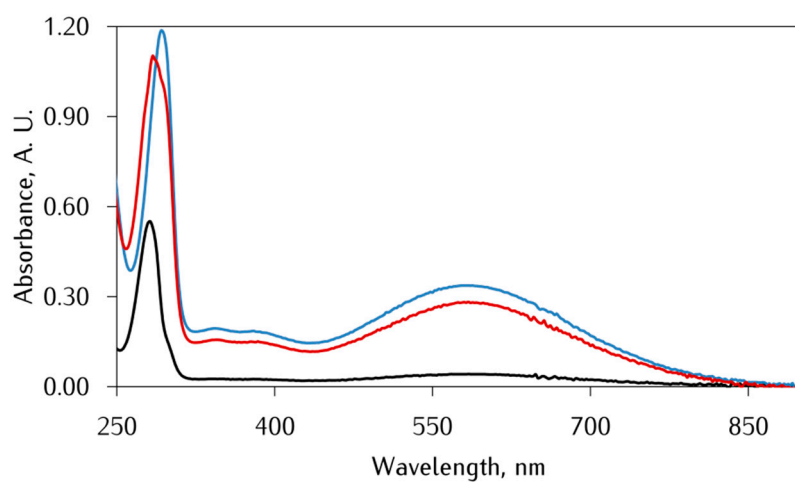

**Figure S4.** UV-Vis spectra of DA (200  $\mu\text{M}$ ) oxidation at 0 h in 10 mM Mops buffer pH 7.0 and 37 °C, in the presence of 10  $\mu\text{M}$  of  $\text{Fe}^{\text{II}}$  (black), 100  $\mu\text{M}$  of  $\text{Fe}^{\text{II}}$  (blue) or 100  $\mu\text{M}$   $\text{Fe}^{\text{II}}$  and 200  $\mu\text{M}$  Ac- $\alpha$ S119-132 peptide (red).

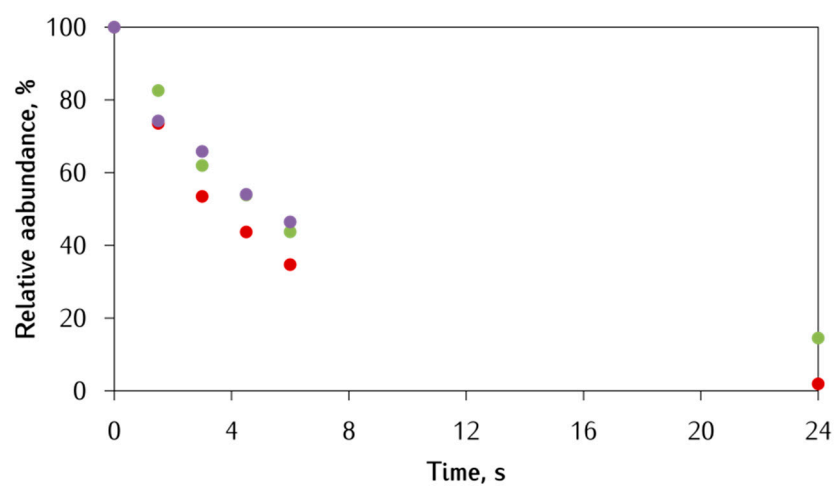

**Figure S5.** RP-HPLC kinetic traces of DA (200  $\mu$ M) oxidation in Mops buffer pH 7.0 and 37  $^{\circ}$ C (blue) in the presence of 100  $\mu$ M of  $\text{Fe}^{\text{II}}$  (red) and 2 equiv. of peptide (Ac- $\alpha$ S<sub>119-132</sub>: green, Ac- $\alpha$ S<sup>P</sup>S<sub>119-132</sub>: purple).

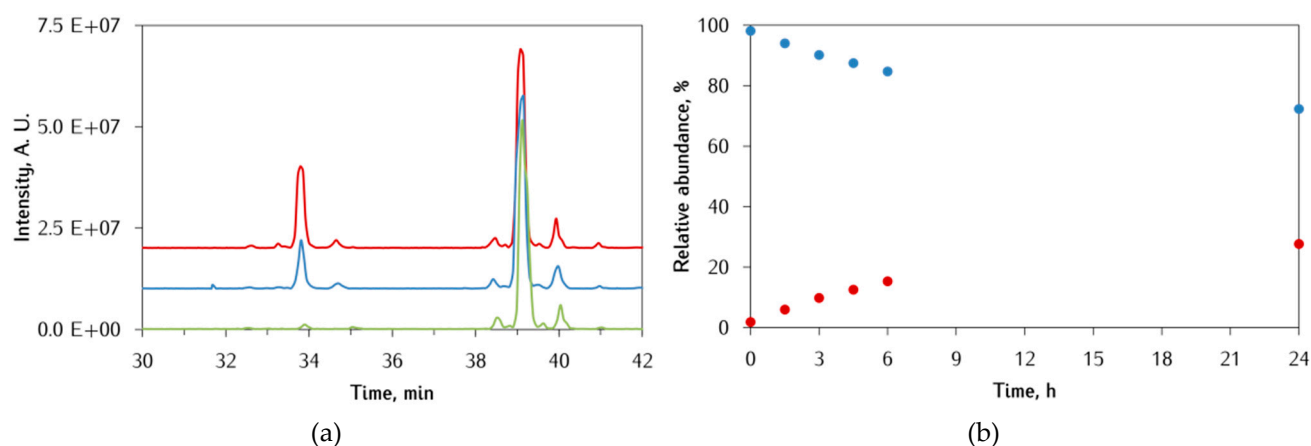

**Figure S6.** (a) HPLC-MS elution profiles of Ac- $\alpha$ S<sub>119-132</sub> (20  $\mu$ M) in Mops buffer pH 7.0 at 37 °C, in the presence of Fe<sup>II</sup> (10  $\mu$ M) and DA (200  $\mu$ M) at the beginning (blue), and after 6 h (red) and 24 h of incubation (green). (b) Percent modification detected by the HPLC-MS analysis: Ac- $\alpha$ S<sub>119-132</sub> ( $t_r$  39 min, blue), Ac- $\alpha$ S<sub>119-132</sub> +16 ( $t_r$  33.8 min, red).

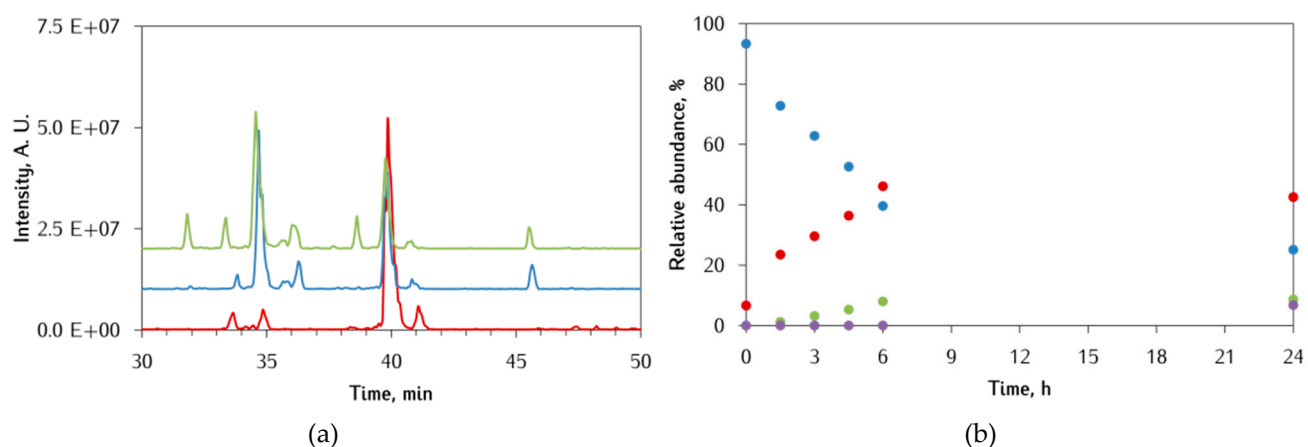

**Figure S7.** (a) HPLC-MS elution profiles of Ac- $\alpha$ SpS<sub>119-132</sub> (20  $\mu$ M) in Mops buffer pH 7.0 at 37 °C, in the presence of Fe<sup>II</sup> (10  $\mu$ M) and DA (200  $\mu$ M) at the beginning (blue), and after 6 h (red) and 24 h of incubation (green). (b) percent modification detected by HPLC-MS analysis: Ac- $\alpha$ SpS<sub>119-132</sub> ( $t_r$  40 min, blue), Ac- $\alpha$ SpS<sub>119-132</sub> +16 ( $t_r$  34.6 min, red), Ac- $\alpha$ SpS<sub>119-132</sub> +32 ( $t_r$  36.4 min, green), Ac-119DPDNEAYEM\*127 fragment ( $t_r$  32 min, purple).

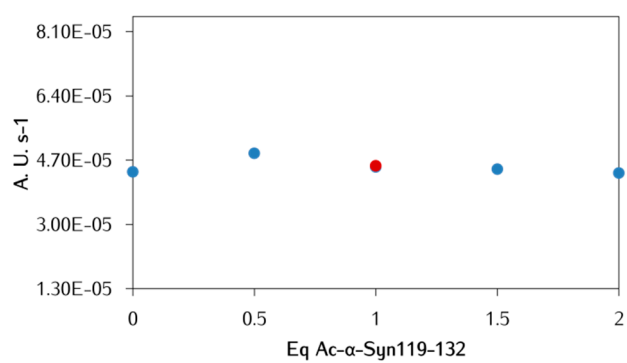

**Figure S8.** Slope of the kinetic traces of 3 mM DA oxidation by 25  $\mu$ M Cu<sup>II</sup> and 0-2 eq of Ac- $\alpha$ S<sub>119-132</sub> in Hepes buffer pH 7.4, 37 °C. Red circle refers to DA autoxidation, while blue ones to Cu<sup>II</sup>-Ac- $\alpha$ S<sub>119-132</sub>.
